# Supplementary material
Source: publisher figshare collection journal article supplement (https://sage.figshare.com/ndownloader/files/22781957)
Supplement: Supplementary file 1 [file 22781957]

## SUPPLEMENTARY MATERIAL

### Supplementary Material 1: Search Strategy for Medline

1: exp Intestinal Neoplasms/ OR ((colorect\* or colon\* or rect\* or anal or anus or intestin\* or bowel\* or sigmoid\*) adj3 (carcinom\* or neoplas\* or adenocarcinom\* or cancer\* or tumor\* or tumour\* or sarcom\* or adenom\* or malignan\*)).mp.

2: exp Endoscopy, Gastrointestinal/ OR (endoscop\* or proctoscop\* or colonoscop\* or sigmoidoscop\* or rectosigmoidoscop\* or proctosigmoidoscop\* or COL or SIG or FSIG).mp.

3: interviews as topic/ or focus groups/ or narration/ or qualitative research/

4: (((("semi-structured" or semistructured or unstructured or informal or "in-depth" or indepth or "face-to-face" or structured or guide) adj3 (interview\* or discussion\* or questionnaire\*)) or (focus group\* or qualitative or ethnograph\* or fieldwork or "field work" or "key informant"))).tw.

5: mix-method\*.tw. or mix method\*.tw.

6: 3 OR 4 OR 5

7: 1 AND 2 AND 6



## Supplementary Material 2: CASP

| Title                                                                                                                                                                   | Author                    | Section A:<br>Are the results valid? Is it worth continuing? |                                                             |                                              |                                                                             |                                                                                       |                                                      |                                                         |                                                                                         | Section B:<br>What are the results?                   |                                                  |                                             |                                             |                                            |
|-------------------------------------------------------------------------------------------------------------------------------------------------------------------------|---------------------------|--------------------------------------------------------------|-------------------------------------------------------------|----------------------------------------------|-----------------------------------------------------------------------------|---------------------------------------------------------------------------------------|------------------------------------------------------|---------------------------------------------------------|-----------------------------------------------------------------------------------------|-------------------------------------------------------|--------------------------------------------------|---------------------------------------------|---------------------------------------------|--------------------------------------------|
|                                                                                                                                                                         |                           | 1. Was the research questions clearly defined?               | 2. Was there a clear statement of the aims of the research? | 3. Is a qualitative methodology appropriate? | 4. Was the research design appropriate to address the aims of the research? | 5. Was the sampling and recruitment strategy appropriate to the aims of the research? | 6. Was the method of data collection well described? | 7. Were any techniques to enhance trustworthiness used? | 8. Has the relationship between researcher and participants been adequately considered? | 9. Have ethical issues been taken into consideration? | 10. Was the data analysis sufficiently rigorous? | 11. Is there a clear statement of findings? | 12. Are the analysis and findings credible? | 12. Was any conflict of interest reported? |
| Gender differences in colorectal cancer screening barriers and information needs                                                                                        | Sanchez et al             | No                                                           | Yes                                                         | Yes                                          | Yes                                                                         | Yes                                                                                   | Yes                                                  | Unclear                                                 | Yes                                                                                     | Yes                                                   | Yes                                              | Yes                                         | Yes                                         | Unclear                                    |
| What affects the uptake of screening for bowel cancer using a faecal occult blood test (FOBT): a qualitative study                                                      | Levy et al                | No                                                           | Yes                                                         | Yes                                          | Yes                                                                         | Yes                                                                                   | Yes                                                  | Unclear                                                 | Unclear                                                                                 | Yes                                                   | Yes                                              | Yes                                         | Yes                                         | Unclear                                    |
| Public perceptions of communicating information about bowel cancer screening                                                                                            | Wackerbarth et al         | No                                                           | Yes                                                         | Yes                                          | Yes                                                                         | Yes                                                                                   | Yes                                                  | Unclear                                                 | Unclear                                                                                 | Yes                                                   | Yes                                              | Yes                                         | Yes                                         | Unclear                                    |
| Patient experiences of colonoscopy, barium enema and CT colonography: a qualitative study                                                                               | von Wagner et al          | No                                                           | Yes                                                         | Yes                                          | Yes                                                                         | Yes                                                                                   | Yes                                                  | Unclear                                                 | Unclear                                                                                 | Yes                                                   | Yes                                              | Yes                                         | Yes                                         | Unclear                                    |
| "It's a tube up your bottom; it makes people nervous": the experience of anxiety in initial colonoscopy patients                                                        | Mikocka-Walus et al       | No                                                           | Yes                                                         | Yes                                          | Yes                                                                         | Yes                                                                                   | Yes                                                  | Unclear                                                 | Unclear                                                                                 | Yes                                                   | Yes                                              | Yes                                         | Yes                                         | Unclear                                    |
| Patient attitudes towards faecal immunochemical testing for haemoglobin as an alternative to colonoscopic surveillance of groups at increased risk of colorectal cancer | Bowyer et al              | Yes                                                          | Yes                                                         | Yes                                          | Yes                                                                         | Yes                                                                                   | Yes                                                  | Unclear                                                 | Unclear                                                                                 | Yes                                                   | Yes                                              | Yes                                         | Yes                                         | Unclear                                    |
| Views, barriers, and suggestions for colorectal cancer screening among American Indian women older than 50 years in the Midwest                                         | Filippi et al             | No                                                           | Yes                                                         | Yes                                          | Yes                                                                         | Yes                                                                                   | Yes                                                  | Unclear                                                 | Unclear                                                                                 | Yes                                                   | Yes                                              | Yes                                         | Yes                                         | No                                         |
| Patients' perceptions of colorectal cancer screening tests and preparatory education in federally qualified health centers                                              | Dr Clement K. Gwede et al | No                                                           | Yes                                                         | Yes                                          | Yes                                                                         | Yes                                                                                   | Yes                                                  | Unclear                                                 | Unclear                                                                                 | No                                                    | Yes                                              | Yes                                         | Yes                                         | No                                         |



|                                                                                                                                     |                      |     |     |     |     |     |     |         |         |     |     |     |     |         |
|-------------------------------------------------------------------------------------------------------------------------------------|----------------------|-----|-----|-----|-----|-----|-----|---------|---------|-----|-----|-----|-----|---------|
| Beyond Adherence: Healthcare Disparities and the Struggle to Get Screened for Colon Cancer                                          | Jean M Hunleth et al | Yes | Yes | Yes | Yes | Yes | Yes | Unclear | Unclear | No  | Yes | Yes | Yes | No      |
| Patient-Reported Needs Following a Referral for Colorectal Cancer Screening                                                         | Karen E.Dyer et al   | No  | Yes | Yes | Yes | Yes | Yes | Yes     | Unclear | Yes | Yes | Yes | Yes | Unclear |
| A stitch in time saves nine: Perceptions about colorectal cancer screening after a non-cancer colonoscopy result. Qualitative study | Pia Kirkegaard et al | Yes | Yes | Yes | Yes | Yes | Yes | Unclear | Unclear | Yes | Yes | Yes | Yes | No      |



### Supplementary Material 3: Summary of Quality Assessment of Included Studies

|                                                                                         | Yes |      | No |     | Unclear |     |
|-----------------------------------------------------------------------------------------|-----|------|----|-----|---------|-----|
|                                                                                         | n   | %    | n  | %   | n       | %   |
| 1. Was the research questions clearly defined?                                          | 3   | 27%  | 8  | 73% | 0       | 0%  |
| 2. Was there a clear statement of the aims of the research?                             | 11  | 100% | 0  | 0%  | 0       | 0%  |
| 3. Is a qualitative methodology appropriate?                                            | 11  | 100% | 0  | 0%  | 0       | 0%  |
| 4. Was the research design appropriate to address the aims of the research?             | 11  | 100% | 0  | 0%  | 0       | 0%  |
| 5. Was the sampling and recruitment strategy appropriate to the aims of the research?   | 11  | 100% | 0  | 0%  | 0       | 0%  |
| 6. Was the method of data collection well described?                                    | 11  | 100% | 0  | 0%  | 0       | 0%  |
| 7. Were any techniques to enhance trustworthiness used?                                 | 1   | 9%   | 0  | 0%  | 10      | 91% |
| 8. Has the relationship between researcher and participants been adequately considered? | 1   | 9%   | 0  | 0%  | 10      | 91% |
| 9. Have ethical issues been taken into consideration?                                   | 9   | 82%  | 2  | 18% | 0       | 0%  |
| 10. Was the data analysis sufficiently rigorous?                                        | 11  | 100% | 0  | 0%  | 0       | 0%  |
| 11. Is there a clear statement of findings?                                             | 11  | 100% | 0  | 0%  | 0       | 0%  |
| 12. Are the analysis and findings credible?                                             | 11  | 100% | 0  | 0%  | 0       | 0%  |
| 13. Was any conflict of interest reported?                                              | 0   | 0%   | 4  | 36% | 7       | 64% |
